# Supplementary material for: Systematic Profiling of DNMT3A Variants Reveals Protein Instability Mediated by the DCAF8 E3 Ubiquitin Ligase Adaptor
Source: PubMed Central journal article supplement — Cancer Discov. 2021 Aug 24;12(1):220–35. doi: 10.1158/2159-8290.CD-21-0560 (PMC8758508; doi:10.1158/2159-8290.cd-21-0560), 2021-08-24
Supplement: NIHMS1737069-supplement-1.pdf [file NIHMS1737069-supplement-1.pdf]

## Supplementary data

### Systematic profiling of *DNMT3A* variants reveals protein instability mediated by the DCAF8 E3 ubiquitin ligase adaptor

#### Authors and affiliations:

Yung-Hsin Huang<sup>1-3,16</sup>, Chun-Wei Chen<sup>2-4</sup>, Venkatasubramaniam Sundaramurthy<sup>2,3,5</sup>, Mikołaj Słabicki<sup>6</sup>, Dapeng Hao<sup>7,17</sup>, Caroline J. Watson<sup>8</sup>, Ayala Tovy<sup>2-3</sup>, Jaime M. Reyes<sup>2,3,5</sup>, Olga Dakhova<sup>9</sup>, Brielle R. Crovetto<sup>2-3</sup>, Christina Galonska<sup>10</sup>, Minjung Lee<sup>11</sup>, Lorenzo Brunetti<sup>2-3</sup>, Yubin Zhou<sup>11</sup>, Katrina Tatton-Brown<sup>12</sup>, Yun Huang<sup>11</sup>, Xiaodong Cheng<sup>13</sup>, Alexander Meissner<sup>10</sup>, Peter J.M. Valk<sup>14</sup>, Lionel Van Maldergem<sup>15</sup>, Mathijs A. Sanders<sup>14</sup>, Jamie R. Blundell<sup>8</sup>, Wei Li<sup>7,18</sup>, Benjamin L. Ebert<sup>6</sup>, Margaret A. Goodell<sup>1-5,\*</sup>

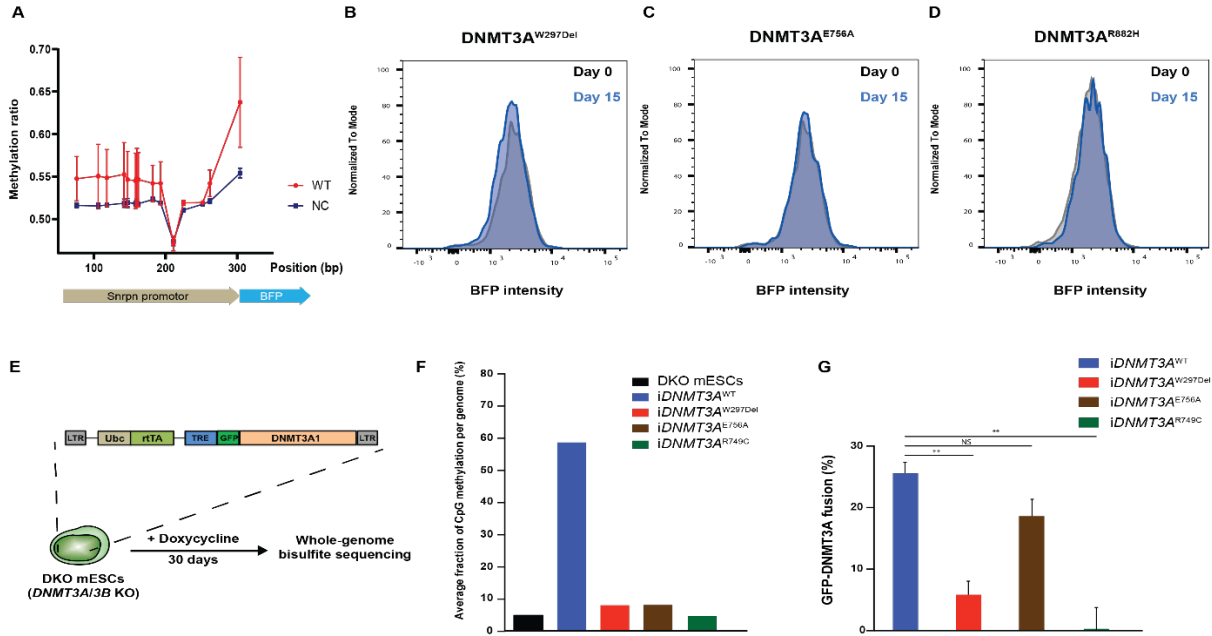

**Supplemental Figure 1: Methyltransferase activity assay and *DNMT3A* mutant functional assay using whole-genome bisulfite sequencing in methylation-deficient ESCs.** (A) Targeted methylation assay across *Snrpn* promoter region. DNMT3A<sup>WT</sup>-transduced cells (red) demonstrated an increased methylation level compared to the vector-only negative control (blue). (B) Methyltransferase activity assay. The graph depicts blue fluorescence intensity in the DNMT3A<sup>W297Del</sup>-transduced cells as measured by flow cytometry on day 0 (grey) and day 15 (blue). (C) Methyltransferase activity assay. The graph depicts blue fluorescence intensity in the DNMT3A<sup>E756A</sup>-transduced cells as measured by flow cytometry on day 0 (grey) and day 15 (blue). (D) Methyltransferase activity assay. The graph depicts blue fluorescence intensity in the DNMT3A<sup>R882H</sup>-transduced cells as measured by flow cytometry on day 0 (grey) and day 15 (blue). (E) Schematic of experimental procedure. *DNMT3A* variants were fused to GFP in a doxycycline-inducible lentiviral vector and expressed in DKO mESCs for 30 days prior to whole genome bisulfite sequencing (WGBS). These ES cells were knocked out for *Dnmt3a/b* and

knocked down for *Dnmt1* to achieve very low background DNA methylation levels. DNMT1 expression was then restored (23) which allows DNA methylation to accumulate and stabilize when *de novo* DNA methyltransferases are re-introduced. (F) Average DNA methylation ratio across millions of CpGs measured by WGBS in DKO mESCs. (n=1) (G) The percentage of cells positive for GFP-DNMT3A fusion protein measured by flow cytometry with three replicates. All *DNMT3A* mutations shown here are compared to DNMT3A<sup>WT</sup> by unpaired t test. Data are presented as mean  $\pm$  s.e.m. \* P<0.05, \*\* P<0.01 and \*\*\* P< 0.001.

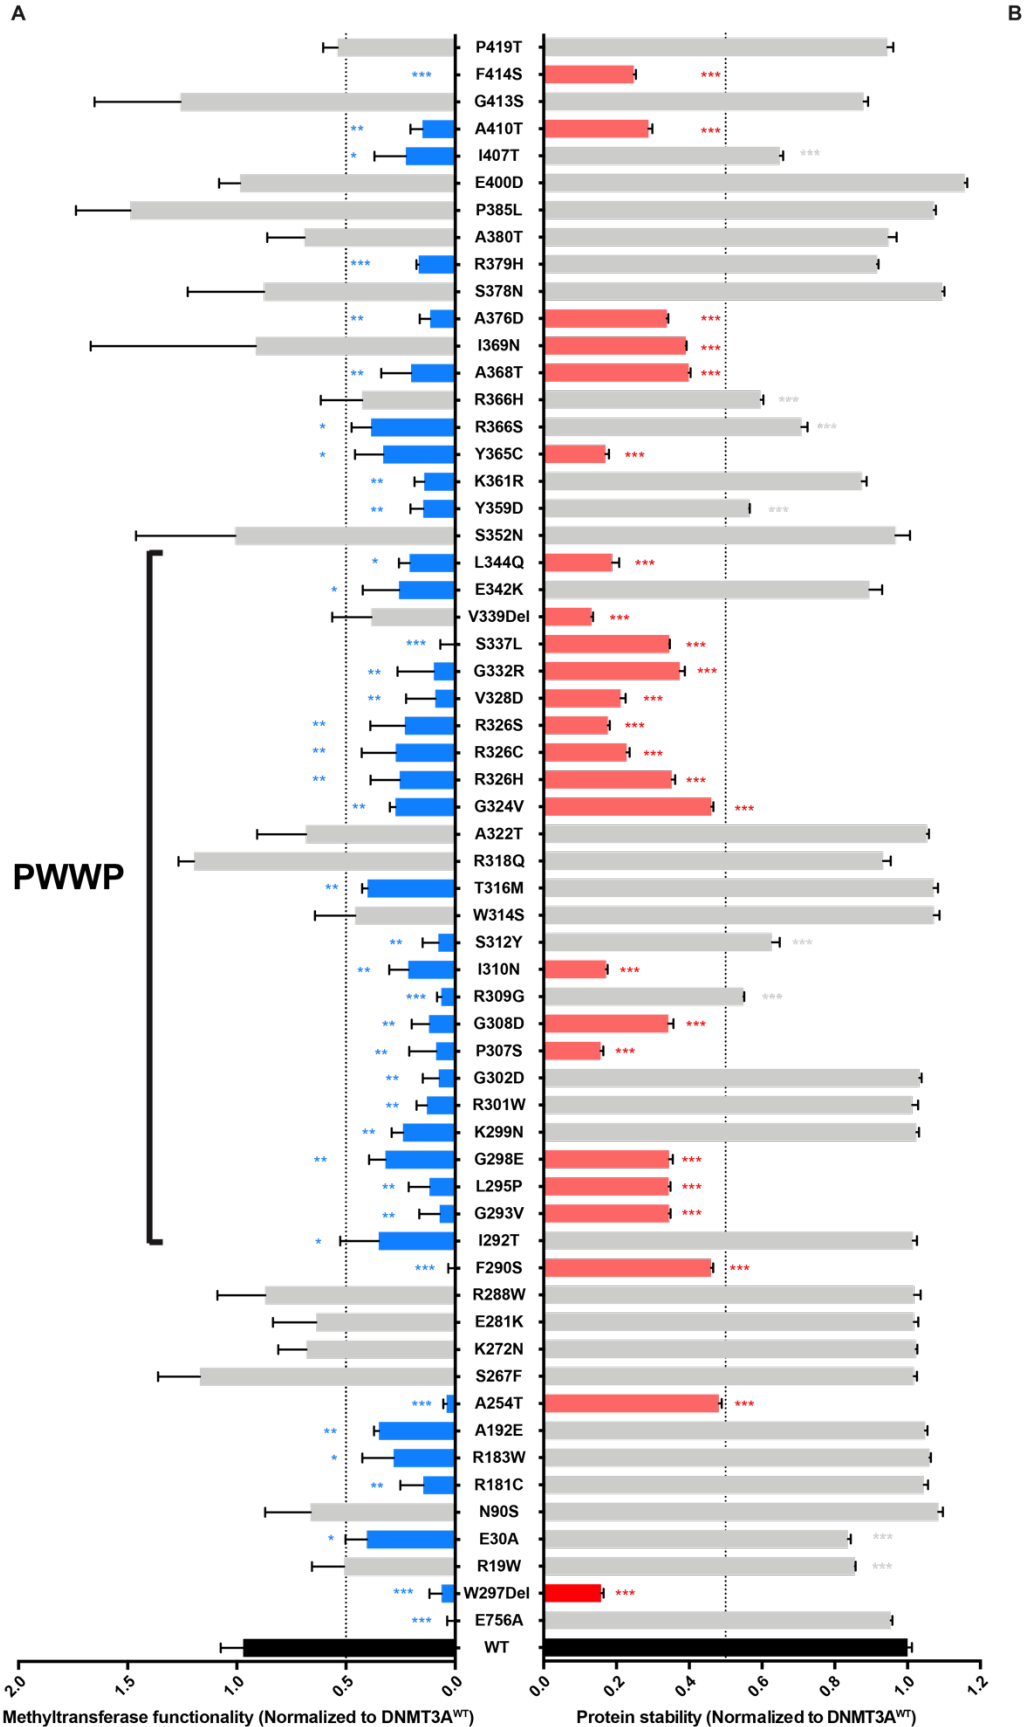

**Supplemental Figure 2: Methyltransferase activity and protein stability assay around the PWWP domain.** (A) The graph depicts the methyltransferase activity of DNMT3A missense mutations around the PWWP domain as measured by flow cytometry and as normalized with BFP-negative % of DNMT3A<sup>WT</sup> infected cells at post-infection day 15. (B) The graph depicts the protein stability represented by the ratio of normalized DNMT3A-GFP and DsRed expression in the bicistronic construct. All *DNMT3A* mutations shown here were chosen from the TBRS, CH and COSMIC databases and are compared to DNMT3A<sup>WT</sup> by unpaired t test. Data are presented as mean  $\pm$  s.e.m. \* P<0.05, \*\* P<0.01 and \*\*\* P< 0.001.

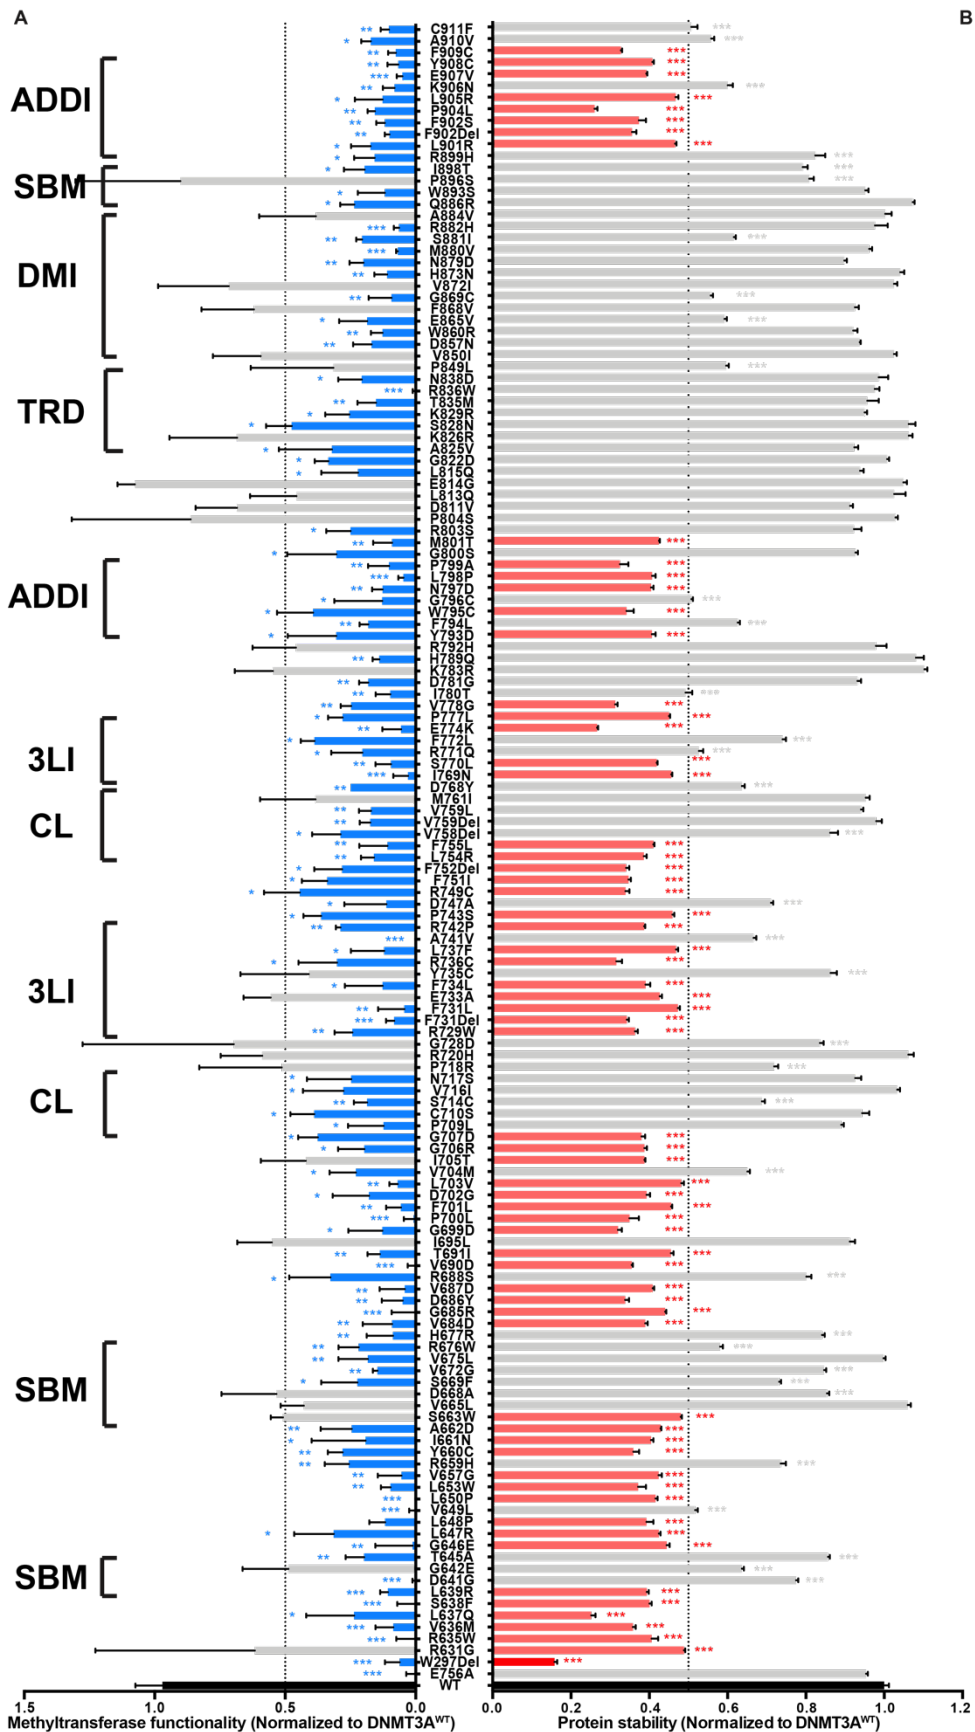

**Supplemental Figure 3: Methyltransferase activity and protein stability assay at the MTase domain.** (A) The graph depicts the methyltransferase activity of *DNMT3A* missense mutations around the MTase domain as measured by flow cytometry and as normalized with BFP-negative % of *DNMT3A*<sup>WT</sup> infected cells at post-infection day 15. (B) The graph depicts the protein stability represented by the ratio of normalized *DNMT3A*-GFP and DsRed expression in the bicistronic construct. SBM represents the substrate (S-adenosyl-L-methionine) binding motif; CL represents the catalytic loop; 3LI represents the interface of *DNMT3A*-*DNMT3L*; ADDI represents the interface between the ADD domain and the catalytic domain; TRD represents the target recognition domain (TRD) and DMI represents the *DNMT3A* homodimer interfaces. All *DNMT3A* mutations shown here were chosen from the TBRS, CH and COSMIC databases and are compared to *DNMT3A*<sup>WT</sup> by unpaired t test. Data are presented as mean  $\pm$  s.e.m. \*  $P < 0.05$ , \*\*  $P < 0.01$  and \*\*\*  $P < 0.001$ .

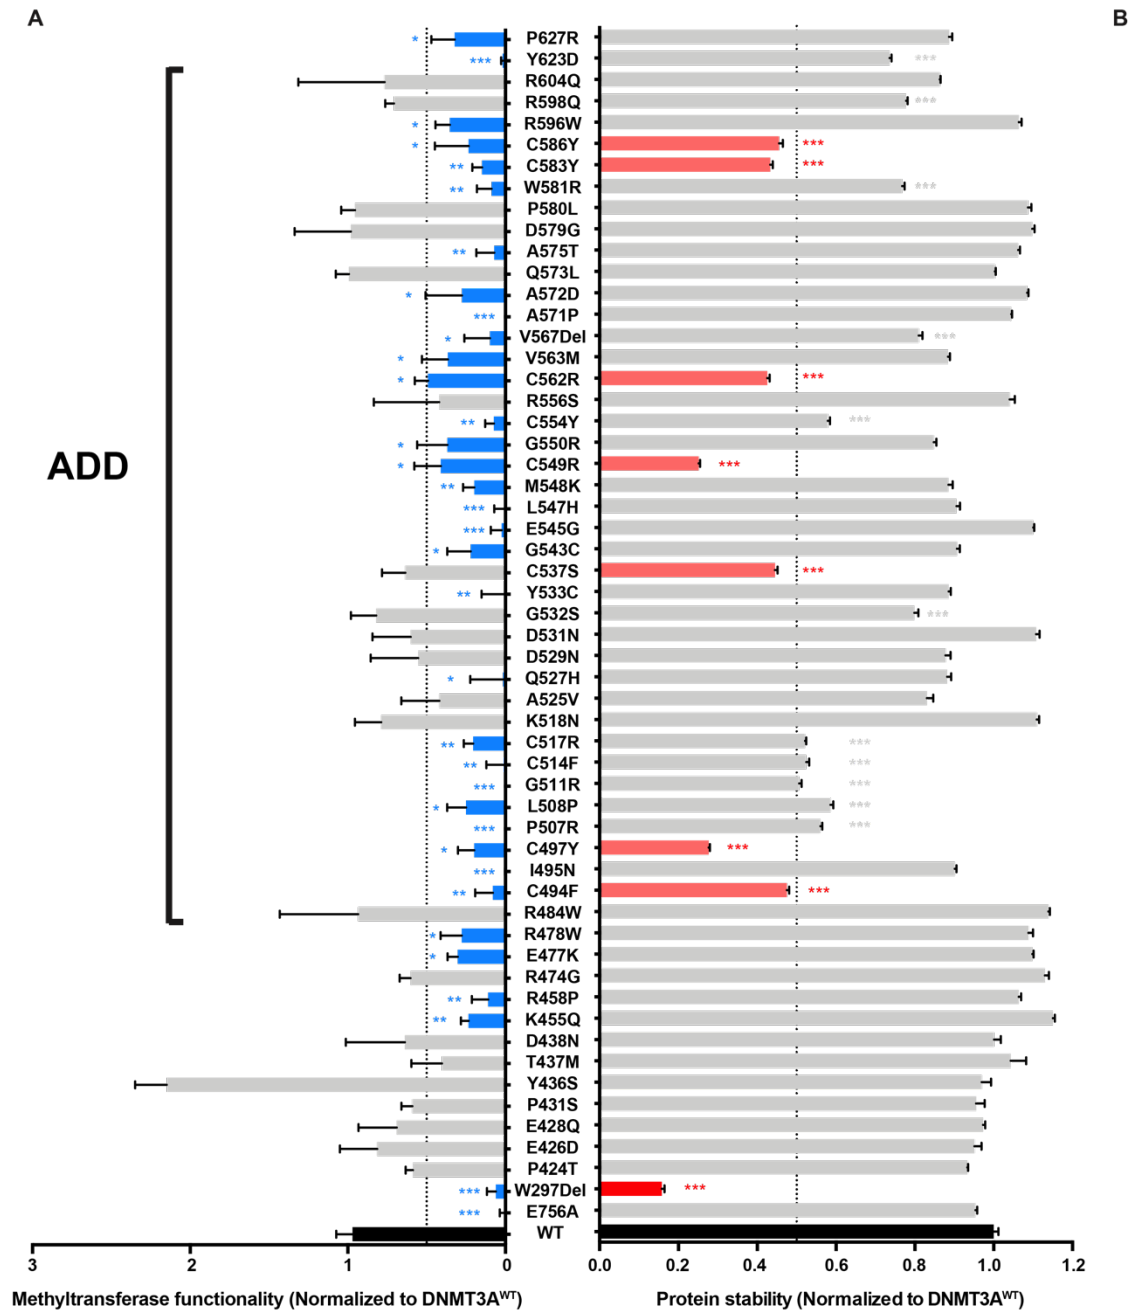

**Supplemental Figure 4: Methytransferase activity and protein stability assay around the ADD domain.** (A) The graph depicts the methyltransferase activity of *DNMT3A* missense mutations around the ADD domain as measured by flow cytometry and as normalized with BFP-negative % of *DNMT3A*<sup>WT</sup> infected cells at post-infectoin day 15. (B) The graph depicts the protein stability represented by the ratio of normalized *DNMT3A*-GFP and DsRed expression in



the bicistronic construct. All *DNMT3A* mutations shown here were chosen from the TBRs, CH and COSMIC databases and are compared to DNMT3A<sup>WT</sup> by unpaired t test. Data are presented as mean  $\pm$  s.e.m. \* P<0.05, \*\* P<0.01 and \*\*\* P< 0.001.

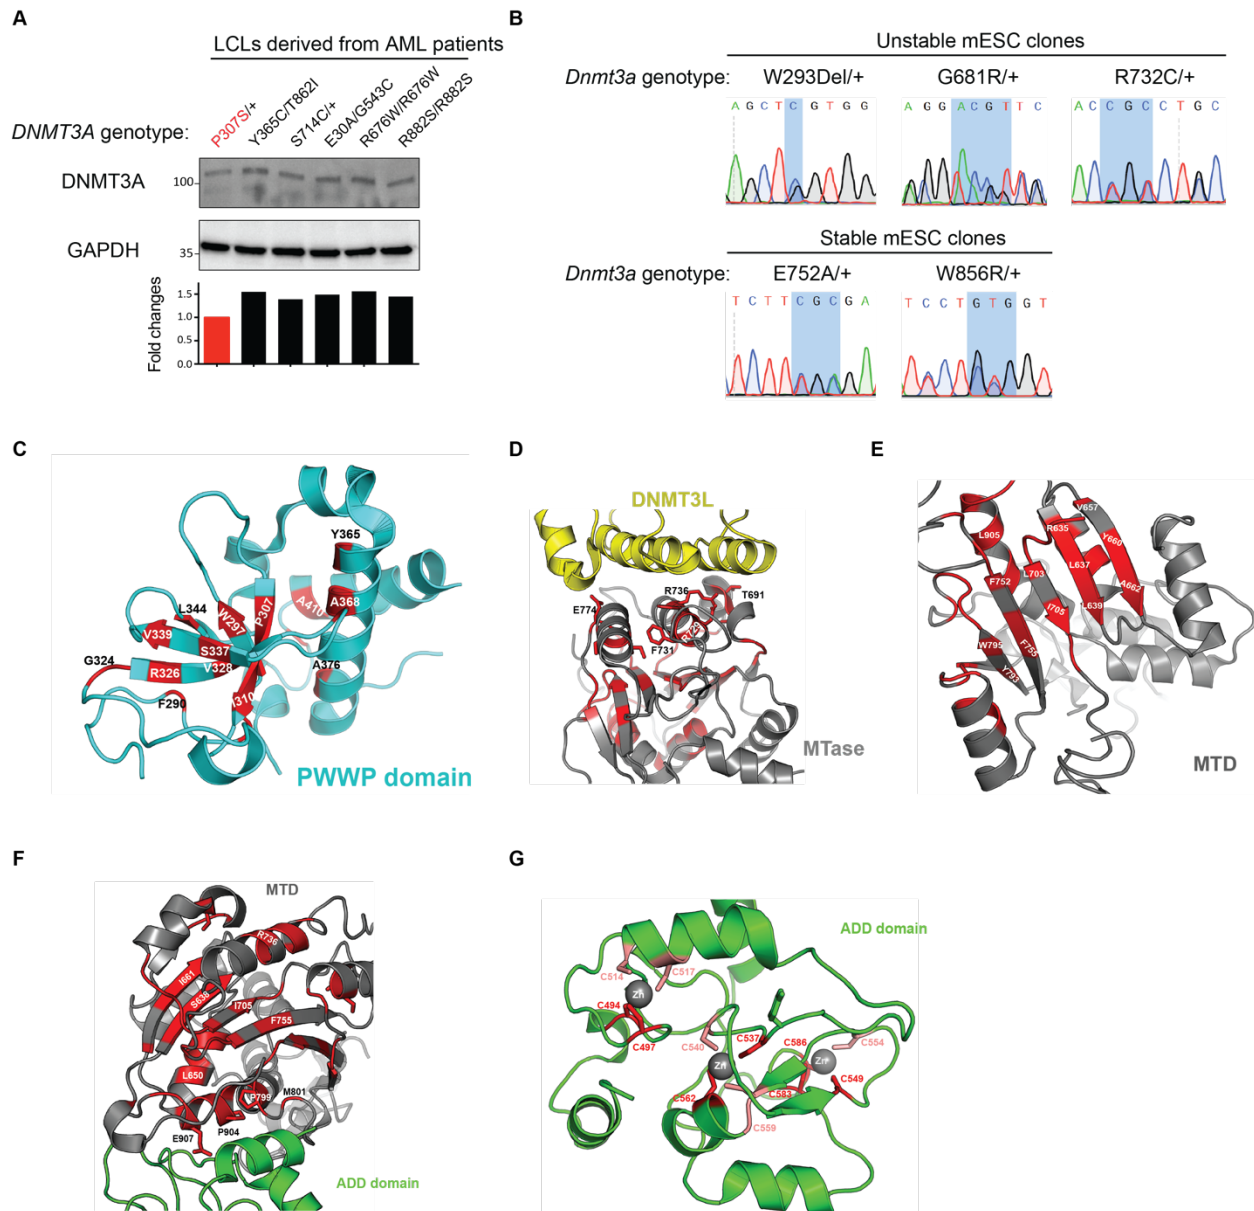

**Supplemental Figure 5: Structural insights into *DNMT3A* missense mutations causing protein instability.** (A) *DNMT3A* protein expression (by western blot) in lymphoblastoid cell lines (LCLs) derived from acute myeloid leukemia (AML) patients. (B) Sanger sequencing tracks showing the heterozygous knock-ins and the successful generation of unstable mutants (*Dnmt3a*<sup>W293Del/+</sup>, *Dnmt3a*<sup>G681R/+</sup>, and *Dnmt3a*<sup>R732C/+</sup>) and stable mutants (*Dnmt3a*<sup>E752A/+</sup> and *Dnmt3a*<sup>W856R/+</sup>). (C) The structural modeling depicts the unstable mutations (red) located in the

PWWP domain (cyan). The structure of the PWWP domain was from PDB 3llr. (D) The structural modeling depicts the unstable mutations (red) located in the methyltransferase domain (MTD) (grey) interacting with DNMT3L (yellow). (E, F) The structural modeling depicts the unstable mutations (red) located in the methyltransferase domain (MTD). The methyltransferase domain is labeled in grey and the ADD domain is labeled in green. (G) The structural modeling depicts the unstable mutations located in the ADD domain labeling as red. The zinc atoms are labeled in grey and the ADD domain is labeled in green. The cysteine residues labeled in salmon are essential for zinc finger formation. The structure of the MTase and DNMT3L was from PDB 4U7T. See also supplemental Figures 1-3.

**A**

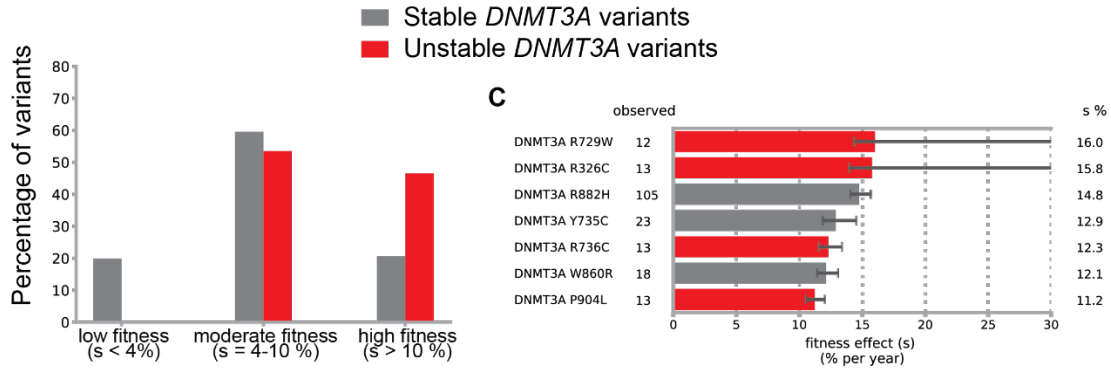

**B**

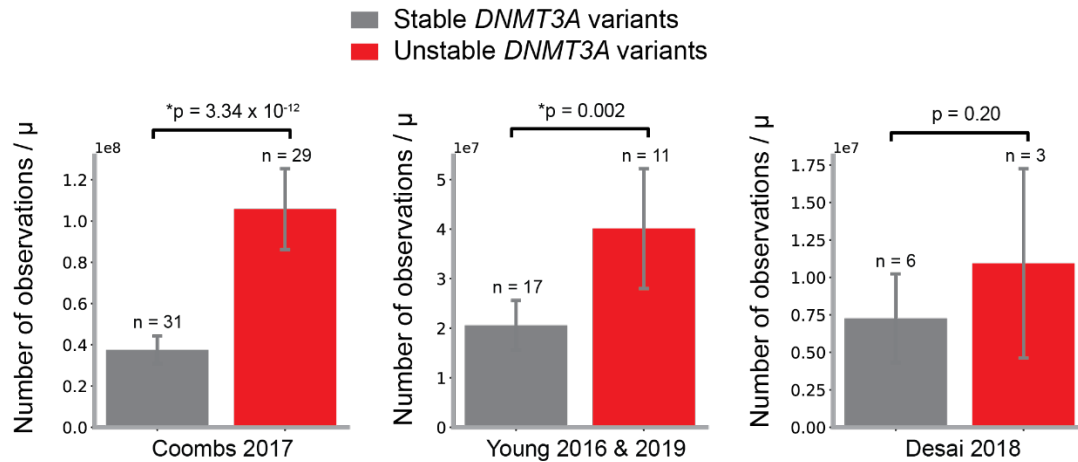

**D**

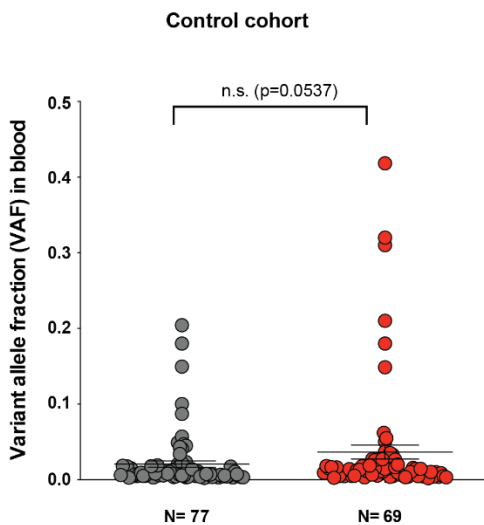

**E**

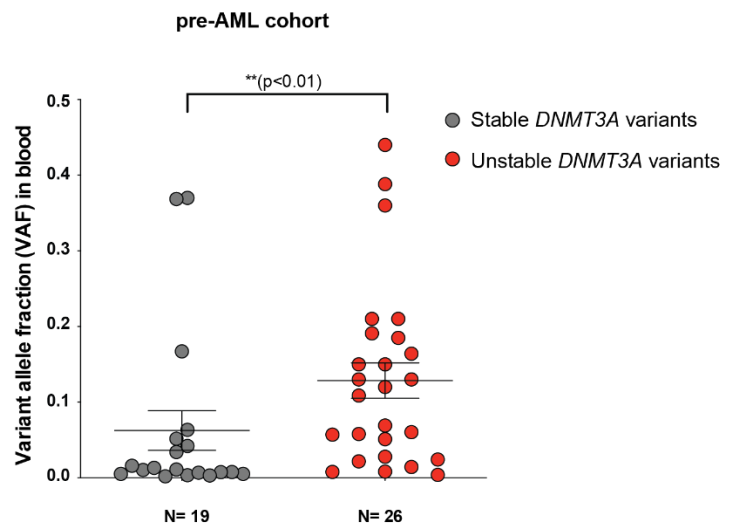

**Supplemental Figure 6: *DNMT3A* variants conferring protein instability are associated with increased clonal expansion in patients. (A) Inferred distribution of fitness effects for**

stable and unstable variants from the maximum likelihood fits after dividing fitness up into three fitness classes (low <4% per year, moderate 4%-10% per year and high >10% per year). A higher proportion of unstable variants confer moderate-to-high fitness (red) relative to stable variants (grey) (B) Number of observed stable and unstable DNMT3A variants after controlling for mutation rate shows that unstable variants are significantly enriched relative to stable variants ( $p = 2 \times 10^{-13}$ , Poisson exact test followed by Fisher's method, with 0.05 significance point at  $p=0.0019$  for 3 combined  $p$ -values). Error bars are one standard deviation assuming Poisson sampling noise. (C) Fitness effects of 7 variants inferred from VAF-density histograms of individual variants (29). Error bars represent 95% confidence intervals for the inferred fitness effect ( $s$ ). (D) The graph depicts the variant allele fractions (VAFs) in the blood of the cohorts of the control group in two categories. *DNMT3A* mutations not affecting protein stability are labeled in gray; *DNMT3A* mutations causing protein instability are labeled in red. (E) The graph depicts a similar categorization of the variant allele fractions (VAFs) in the blood of the cohorts of the pre-AML group (33).

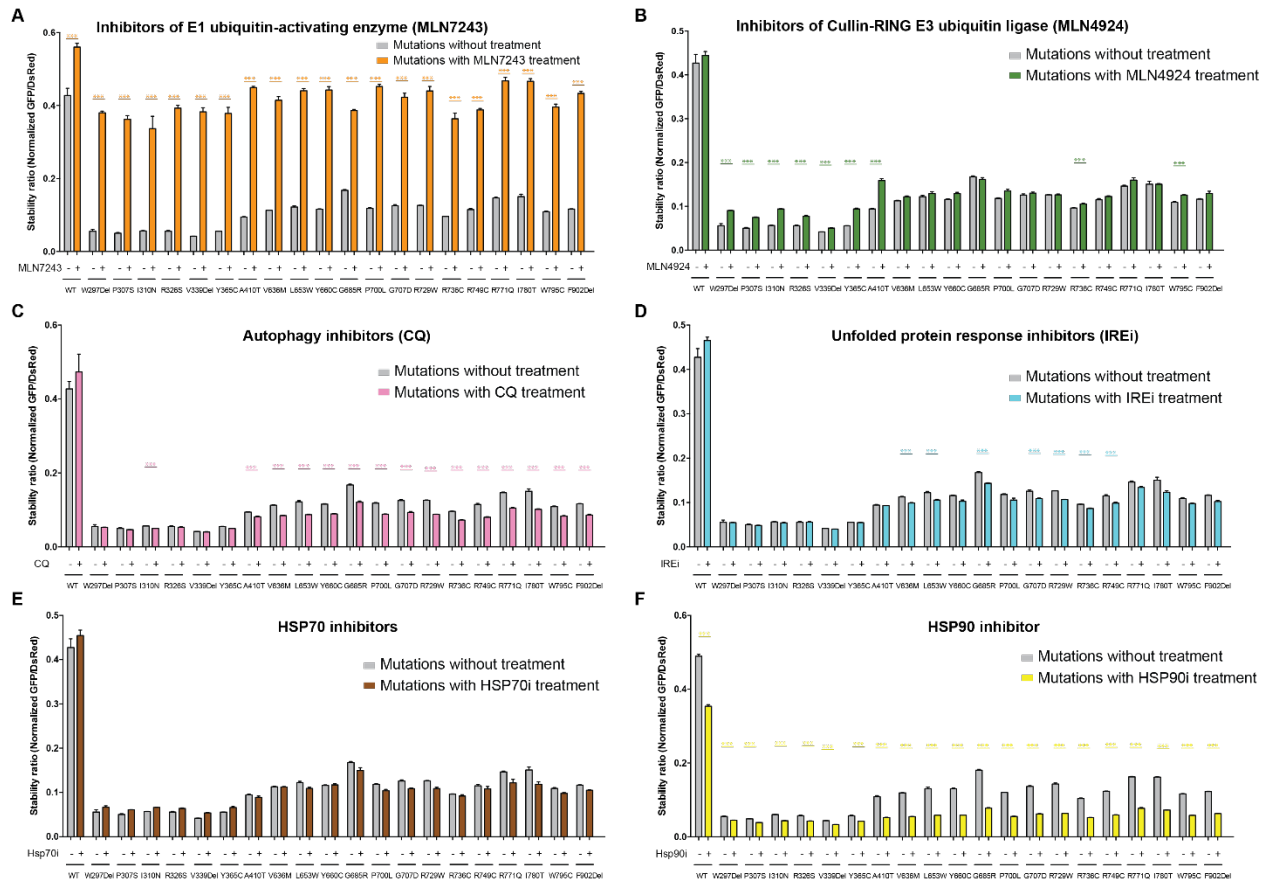

**Supplemental Figure 7: Inhibitor of E1 ubiquitin-activating enzymes can rescue DNMT3A mutant protein expression while HSP90i further destabilizes DNMT3A mutant protein expression.** All graphs depict the stability ratio of mean fluorescence intensity (MFI) of DNMT3A-GFP versus MFI of DsRed with the indicated inhibitor treatments. Treated with in (A) inhibitors of E1 ubiquitin-activating enzymes, in (B) with inhibitors of Cullin-RING E3 ubiquitin ligases, in (C) with inhibitors of autophagy (CQ), in (D) with inhibitors of the unfolded protein response, in (E) with a HSP70i inhibitor, in (F) with an HSP90i inhibitor. In all cases, flow cytometry was performed 48 hours after transfection.

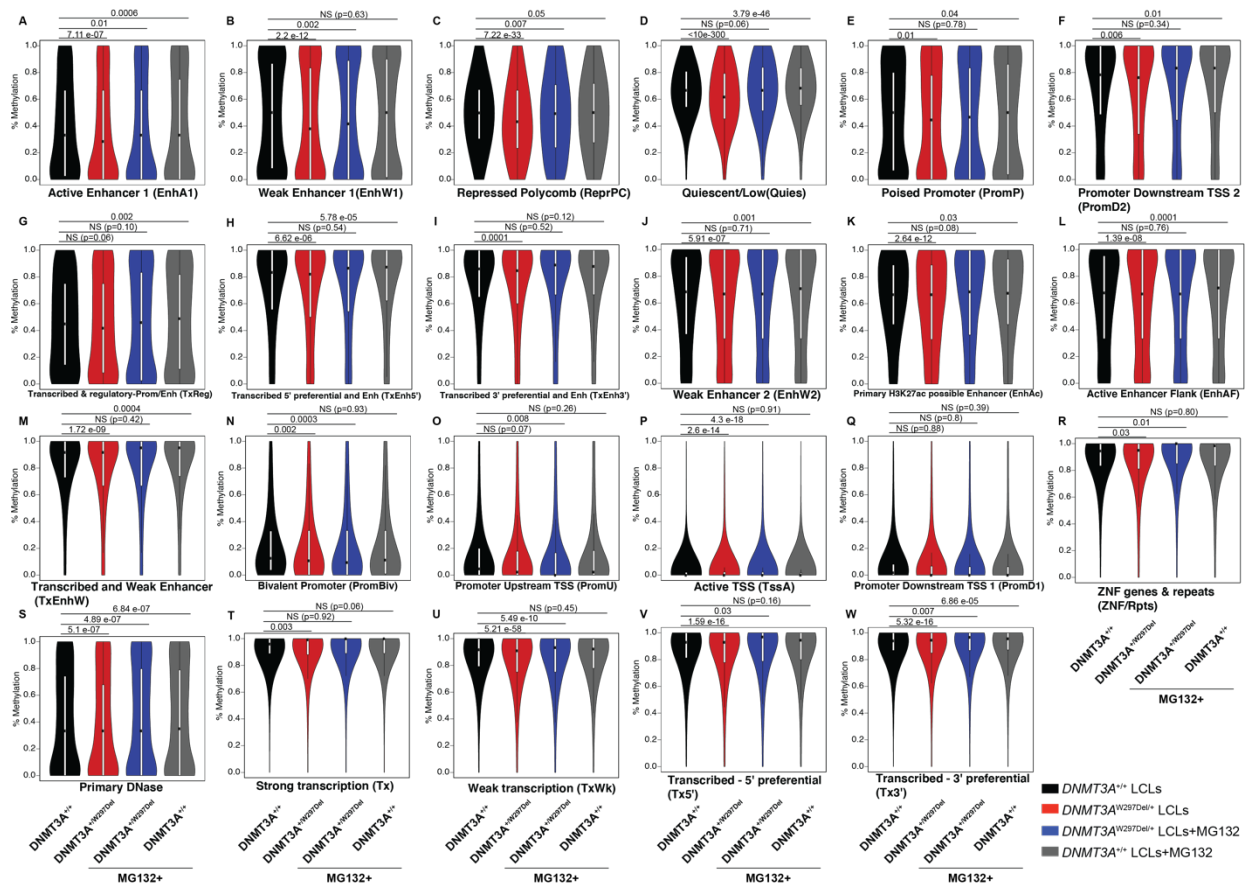

**Supplemental Figure 8: Active/weak enhancers, heterochromatin, poised promoter and regions with repressed polycomb complexes were sensitive while regions closed to TSS and transcribed regions were inert to proteasome inhibitors administration.** All graphs depict the methylation ratio of the indicated genomic regions: (A) 8869 active enhancer regions as defined in the epigenomic roadmap project, (B) 15029 weak enhancer regions, (C) 13701 regions with repressed polycomb complexes, (D) 101293 quiescent regions, (E) 6312 poised promoter regions, (F) 6085 regions downstream of promoters, (G) 7870 transcribed and regulatory promoter/enhancer regions, (H) 8904 5' preferentially transcribed enhancers, (I) 7231 3' preferentially transcribed enhancers, (J) 35253 weak enhancers, (K) 7540 putative H3K27ac enhancers, (L) 13756 active enhancer flanking regions, (M) 19613 transcribed and weak enhancers, (N) 7053 bivalent promoters, (O) 15379 promoters upstream of the TSS, (P) 6305

active TSS regions, (Q) 10492 promoters downstream of the TSS, (R) 2308 zinc finger genes and repeats, (S) 17820 primary DNase sensitive regions, (T) 12003 regions with strong transcription, (U) 52563 regions with weak transcription, (V) 22059 5' preferential transcribed regions, (W) 39659 3' preferential transcribed regions. All regions were as defined in the epigenome roadmap project.
